# Supplementary material
Source: publisher figshare collection journal article supplement (https://diabetesjournals.figshare.com/ndownloader/files/35008834)
Supplement: Supplementary file 1 [file 35008834]

## SUPPLEMENTARY INFORMATION

### **Immunogenicity and safety of SARS-CoV-2 mRNA vaccines in a cohort of patients with type 1 diabetes**

Francesca D'Addio<sup>1,2,#</sup>, Gianmarco Sabiu<sup>1,3,#</sup>, Vera Usuelli<sup>1</sup>, Emma Assi<sup>1</sup>, Ahmed Abdelsalam<sup>1</sup>, Anna Maestroni<sup>1</sup>, Andy Joe Seelam<sup>1</sup>, Moufida Ben Nasr<sup>1</sup>, Cristian Loretelli<sup>1</sup>, Davide Mileto<sup>4</sup>, Giada Rossi<sup>1</sup>, Ida Pastore<sup>2</sup>, Laura Montefusco<sup>2</sup>, Paola S. Morpurgo<sup>2</sup>, Laura Plebani<sup>2</sup>, Antonio Rossi<sup>2</sup>, Enrica Chebat<sup>2</sup>, Andrea M. Bolla<sup>2</sup>, Elena Lunati<sup>2</sup>, Chiara Mameli<sup>5</sup>, Maddalena Macedoni<sup>5</sup>, Spinello Antinori<sup>6</sup>, Stefano Rusconi<sup>6</sup>, Maurizio Gallieni<sup>3</sup>, Cesare Berra<sup>7</sup>, Franco Folli<sup>8</sup>, Massimo Galli<sup>6</sup>, Maria Rita Gismondo<sup>4</sup>, Gian Vincenzo Zuccotti<sup>5</sup> and Paolo Fiorina<sup>1,2,9</sup>

<sup>1</sup>International Center for T1D, Pediatric Clinical Research Center Romeo ed Enrica Invernizzi, Dipartimento di Scienze Biomediche e Cliniche L. Sacco, Università di Milano, Milan, Italy;

<sup>2</sup>Division of Endocrinology, ASST Fatebenefratelli-Sacco, Milan, Italy; <sup>3</sup>Nephrology and Dialysis Unit, ASST Fatebenefratelli Sacco and Dipartimento di Scienze Biomediche e Cliniche L. Sacco, Università di Milano, Milan, Italy; <sup>4</sup>Diagnostic Services, Clinical Microbiology, Virology and Bioemergence Diagnostics, ASST Fatebenefratelli-Sacco and Dipartimento di Scienze Biomediche e Cliniche L. Sacco, Università di Milano, Milan, Italy; <sup>5</sup>Pediatric Department, Buzzi Children's Hospital and Dipartimento di Scienze Biomediche e Cliniche L. Sacco, Università di Milano, Milan, Italy; <sup>6</sup>Department of Infectious Diseases, ASST Fatebenefratelli-Sacco and Dipartimento di Scienze Biomediche e Cliniche L. Sacco, Università di Milano, Milan, Italy; <sup>7</sup>Metabolic Diseases and Diabetes, Multimedica IRCCS, Sesto San Giovanni, Milan, Italy; <sup>8</sup>Endocrinology and Metabolism, Department of Health Science, Università di Milano, ASST Santi Paolo e Carlo, Milan, Italy; <sup>9</sup>Nephrology Division, Boston Children's Hospital, Harvard Medical School, Boston, MA, USA. <sup>#</sup>These authors contributed equally to this work.

## **TABLE OF CONTENTS:**

SUPPLEMENTARY FIGURES 1-3

SUPPLEMENTARY TABLE 1-3

## SUPPLEMENTARY FIGURES

**Supplementary Figure 1.** Study flow-chart.

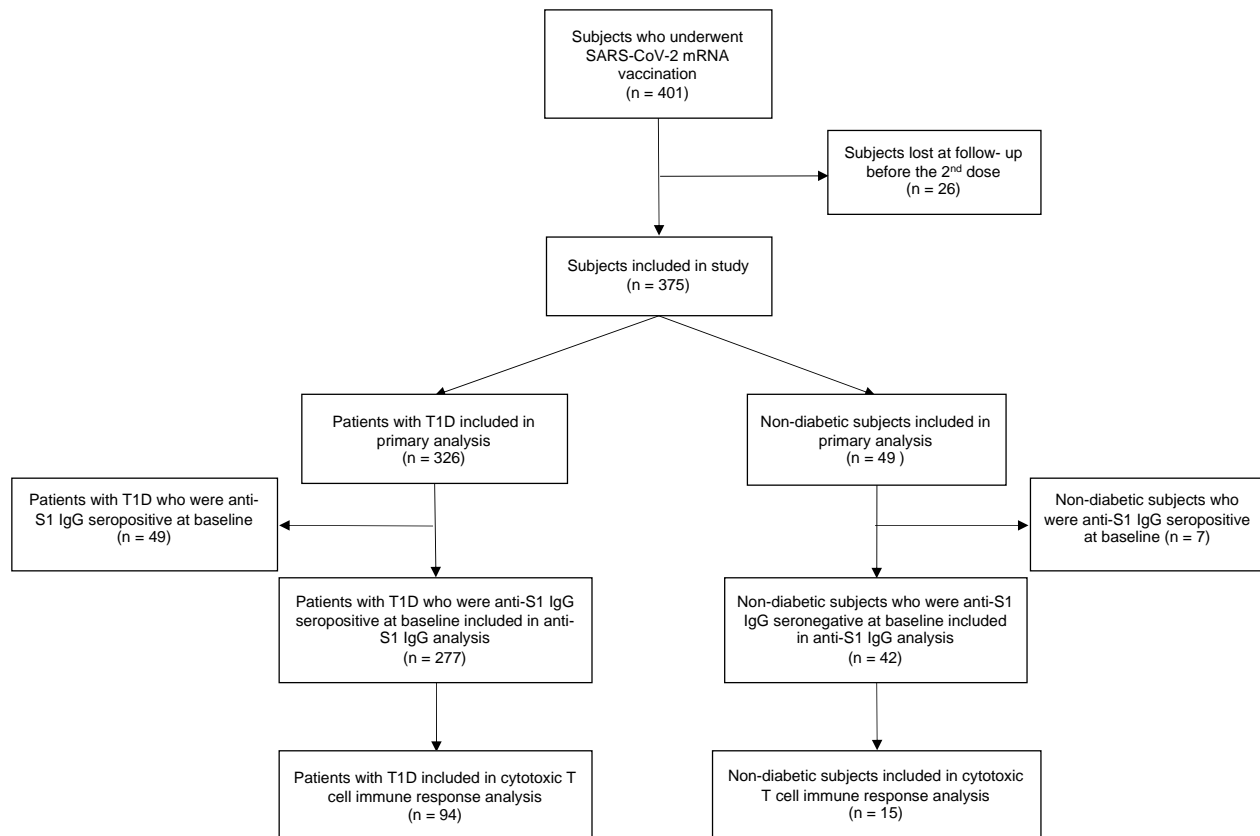

**Supplementary Figure 2. Local and systemic adverse effects in T1D patients and non-diabetic subjects who received two doses of SARS-CoV-2 mRNA vaccine.**

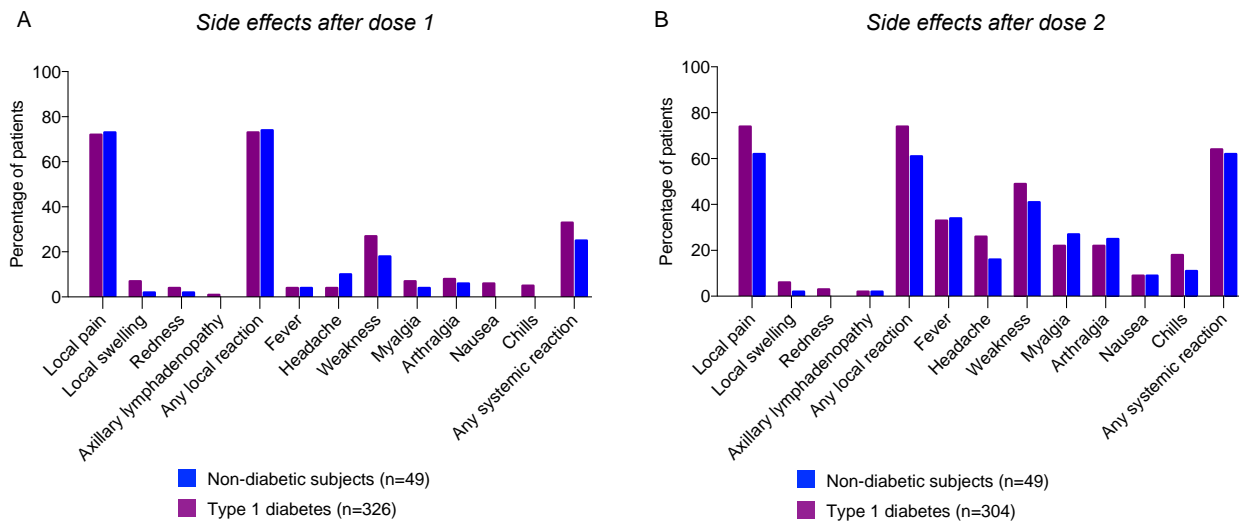

(A, B). Bar graphs representing percentage of T1D patients and non-diabetic subjects reporting local and systemic reactions after dose 1 (A) and after dose 2 (B) of the SARS-CoV-2 mRNA vaccines. Assessment ‘after dose 1’ was performed 3-4 weeks after the first dose, and assessment ‘after dose 2’ was performed 4 weeks after the second dose.

**Abbreviations:** T1D, type 1 diabetes.

**Supplementary Figure 3.** Anti-SARS-CoV-2 antibody response in patients with T1D and non-diabetic subjects who were seropositive before vaccination.

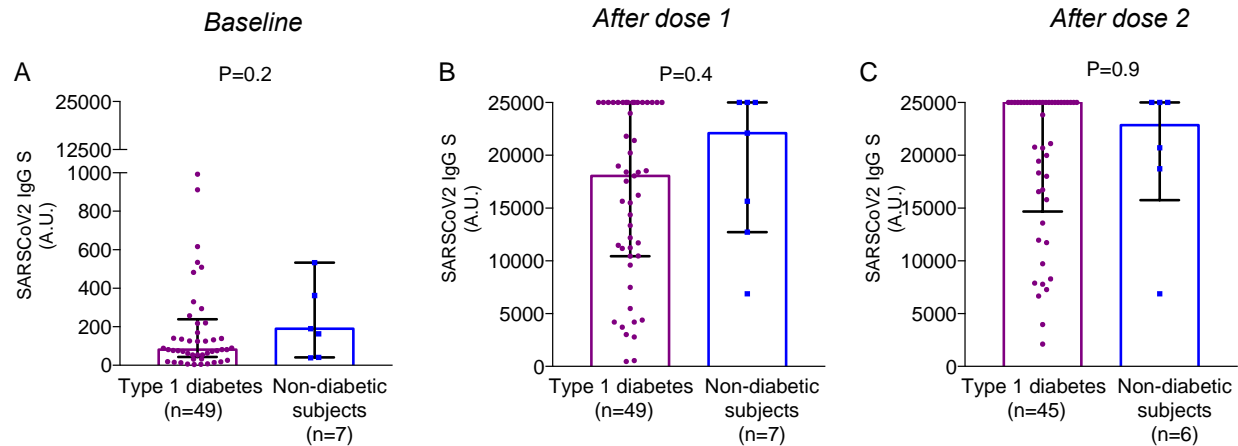

**(A, B, C).** Anti-SARS-CoV-2 antibody levels in SARS-CoV-2-seropositive patients with T1D and non-diabetic subjects at baseline (A), after dose 1 (B), and after dose 2 (C). Anti-SARS-CoV-2 antibody titers are reported as median with interquartile range. ‘After dose 1’ was 3-4 weeks after the first dose, and ‘after dose 2’ was 4 weeks after the second dose.

## SUPPLEMENTARY TABLES

**Supplementary Table 1.** Distribution of mRNA SARS-CoV-2 vaccines in the study population.

|                              | <b>BNT162b2</b> | <b>mRNA-1273</b> |
|------------------------------|-----------------|------------------|
| T1D – n of patients (%)      | 168 (51.5)      | 158 (49.5)       |
| Controls – n of patients (%) | 29 (59.1)       | 20 (40.9)        |

**Abbreviations:** n, number; T1D, type 1 diabetes; BNT162b2 Pfizer mRNA SARS-CoV-2 vaccine administered at day 0 and 21; mRNA-1273, Moderna mRNA SARS-CoV-2 vaccine administered at day 0 and 28.

**Supplementary Table 2.** Multivariable analysis of factors associated with the development of cytotoxic response in the whole study population after having received the first and the second dose of the SARSCoV2 mRNA vaccine.

| <i>Cytotoxic response after dose 1</i> |                                        |                |
|----------------------------------------|----------------------------------------|----------------|
| <b>Variables</b>                       | <b>Regression coefficient (95% CI)</b> | <b>P value</b> |
| Type 1 diabetes                        | -3.68 (-5.49 to -1.88)                 | 0.0001         |
| Gender (Male)                          | -0.01 (-0.97 to 0.93)                  | 0.96           |
| Age (years)                            | -0.04 (-0.08 to -0.01)                 | 0.01           |
| Cardiovascular disease                 | 1.92 (-0.57 to 4.47)                   | 0.12           |
| Hypertension                           | -0.31 (-1.99 to 1.36)                  | 0.71           |
| Autoimmune thyroid disease             | -0.25 (-1.45 to 0.95)                  | 0.68           |
| <i>Cytotoxic response after dose 2</i> |                                        |                |
| <b>Variables</b>                       | <b>Regression coefficient (95% CI)</b> | <b>P value</b> |
| Type 1 diabetes                        | -1.76 (-3.22 to -0.30)                 | 0.01           |
| Gender (Male)                          | 0.42 (-0.61 to 1.46)                   | 0.42           |
| Age (years)                            | -0.02 (-0.05 to 0.01)                  | 0.21           |
| Hypertension                           | 0.43 (-1.01 to 1.88)                   | 0.55           |
| Autoimmune thyroid disease             | -0.78 (-2.43 to 0.86)                  | 0.35           |

**Abbreviations:** CI, confidence interval; after dose 1, the first dose; after dose 2, after the second dose of the SARS-CoV-2 mRNA vaccines.

**Supplementary Table 3. Continuous glucose monitoring in patients with T1D receiving the SARS-CoV-2 mRNA vaccine at three timepoints.**

|                                                | <b>Baseline<br/>(n=150)</b> | <b>After the 1<sup>st</sup><br/>dose<br/>(n=150)</b> | <b>After the 2<sup>nd</sup><br/>dose<br/>(n=150)</b> | <b>p value</b>                                            |
|------------------------------------------------|-----------------------------|------------------------------------------------------|------------------------------------------------------|-----------------------------------------------------------|
| <i>Time in range %</i>                         | 64.1 ± 18.8                 | 65.0 ± 18.2                                          | 62.6 ± 18.6                                          | 0.91 <sup>^</sup> ; 0.76 <sup>↓</sup> ; 0.51 <sup>⊥</sup> |
| <i>Time above range %</i>                      | 32.9 ± 19.8                 | 32.2 ± 18.7                                          | 34.3 ± 19.1                                          | 0.95 <sup>^</sup> ; 0.79 <sup>↓</sup> ; 0.60 <sup>⊥</sup> |
| <i>Time below range %</i>                      | 3.0 ± 2.6                   | 2.9 ± 3.2                                            | 2.9 ± 3.3                                            | 0.98 <sup>^</sup> ; 0.99 <sup>↓</sup> ; 0.99 <sup>⊥</sup> |
| <i>Use of CGM %</i>                            | 91.7 ± 12.2                 | 91.0 ± 13.0                                          | 89.2 ± 16.7                                          | 0.89 <sup>^</sup> ; 0.30 <sup>↓</sup> ; 0.56 <sup>⊥</sup> |
| <i>estimated HbA1c <sup>§</sup> %</i>          | 7.2 ± 0.8                   | 7.2 ± 0.8                                            | 7.3 ± 0.8                                            | 0.99 <sup>^</sup> ; 0.93 <sup>↓</sup> ; 0.93 <sup>⊥</sup> |
| <i>Coefficient of variation <sup>†</sup> %</i> | 33.2 ± 6.7                  | 33.2 ± 6.4                                           | 34.5 ± 6.8                                           | 0.99 <sup>^</sup> ; 0.33 <sup>↓</sup> ; 0.34 <sup>⊥</sup> |
| <i>Glucose level (mg/dl)</i>                   | 161.1 ± 30.0                | 160.6 ± 30.0                                         | 163.6 ± 31.0                                         | 0.99 <sup>^</sup> ; 0.76 <sup>↓</sup> ; 0.69 <sup>⊥</sup> |

Plus-minus values are means ± SD.

<sup>^</sup>Baseline vs “After the 1<sup>st</sup> dose”; <sup>↓</sup>Baseline vs. “After the 2<sup>nd</sup> dose”; <sup>⊥</sup>“After the 1<sup>st</sup> dose” vs. “After the 2<sup>nd</sup> dose”; <sup>§</sup> Complete data from 122 patients; <sup>†</sup> Complete data from 118 patients.

**Abbreviations:** CGM, continuous glucose monitoring; HbA1c, glycated hemoglobin.
